# Supplementary material for: Hierarchical cathode constructed by carbon coated Na3.5VMn0.5Cr0.5(PO4)3 nanoparticles on rGO for high-capacity and long-cycle life sodium storage
Source: Royal Society of Chemistry journal article supplement (doi:10.1039/d3ma00074e), 2023-01-01
Supplement: d3ma00074e1.pdf [file d3ma00074e1.pdf]

## Supporting information for

**Hierarchical Cathode Constructed by Carbon Coated  $\text{Na}_{3.5}\text{VMn}_{0.5}\text{Cr}_{0.5}(\text{PO}_4)_3$**

**Nanoparticles on rGO for High-Capacity and Long-Cycle-Life Sodium Storage**

Jinhao Wang, Longzhu Zhao, Fengqi Lu\*

Key Laboratory of New Processing Technology for Nonferrous Metal & Materials Ministry of Education, Guangxi Key Laboratory of Optical and Electronic Materials and Devices, College of Materials Science and Engineering, Guilin University of Technology, Guilin, 541004, P. R. China.

\*Corresponding author, E-mail: [lufengqi@glut.edu.cn](mailto:lufengqi@glut.edu.cn).

**Table S1.** The refinement reliability factors of XRD.

| Composition | $R_{wp}$ (%) | $R_p$ (%) | $R_{Bragg}$ (%) |
|-------------|--------------|-----------|-----------------|
| VMC@C       | 1.86         | 1.18      | 0.15            |
| VMC@C/rGO   | 1.87         | 1.27      | 0.20            |

**Table S2.** Structural information of VMC@C/rGO derived from Rietveld refinement.

| Atom | Site | $x$       | $y$       | $z$       | Occupancy |
|------|------|-----------|-----------|-----------|-----------|
| Na1  | 6b   | 0         | 0         | 0         | 1         |
| Na2  | 18e  | 0.6221(9) | 0         | 0.25      | 0.855(2)  |
| V    | 12c  | 0         | 0         | 0.1467(1) | 0.5       |
| Mn   | 12c  | 0         | 0         | 0.1467(1) | 0.25      |
| Cr   | 12c  | 0         | 0         | 0.1467(1) | 0.25      |
| P    | 18e  | 0.2955(7) | 0         | 0.25      | 1         |
| O1   | 36f  | 0.0507(2) | 0.2304(1) | 0.1906(5) | 1         |
| O2   | 36f  | 0.2047(1) | 0.1604(9) | 0.0926(4) | 1         |

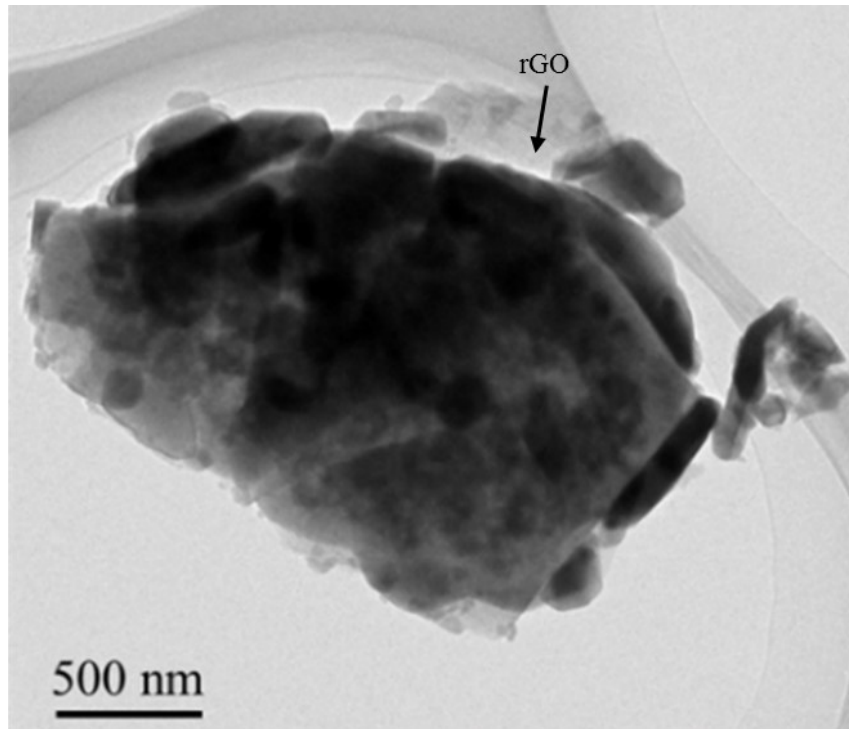

**Fig. S1.** TEM image of VMC@C/rGO.

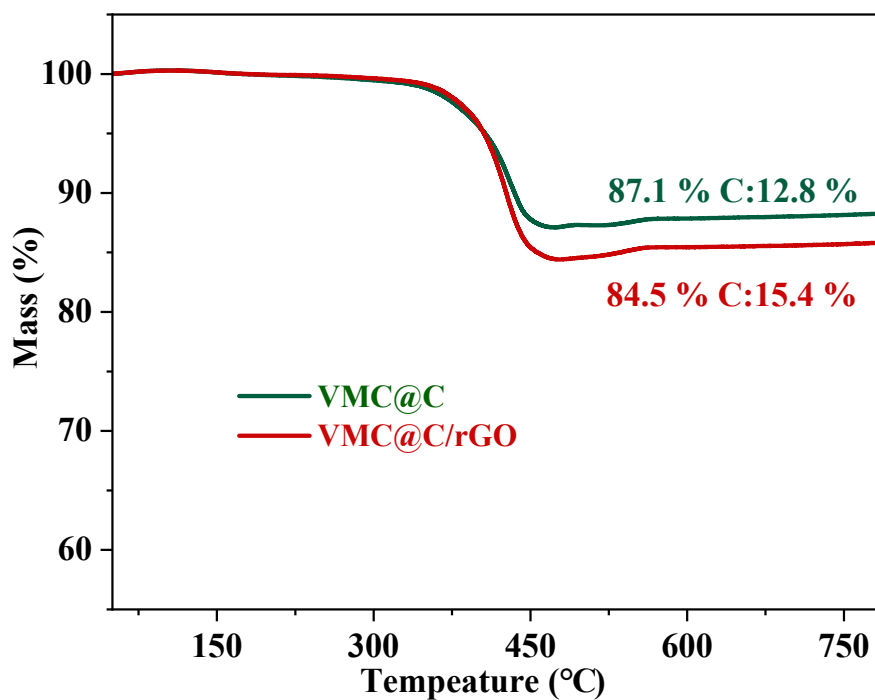

Fig. S2. TG curves of VMC@C and VMC@C/rGO.

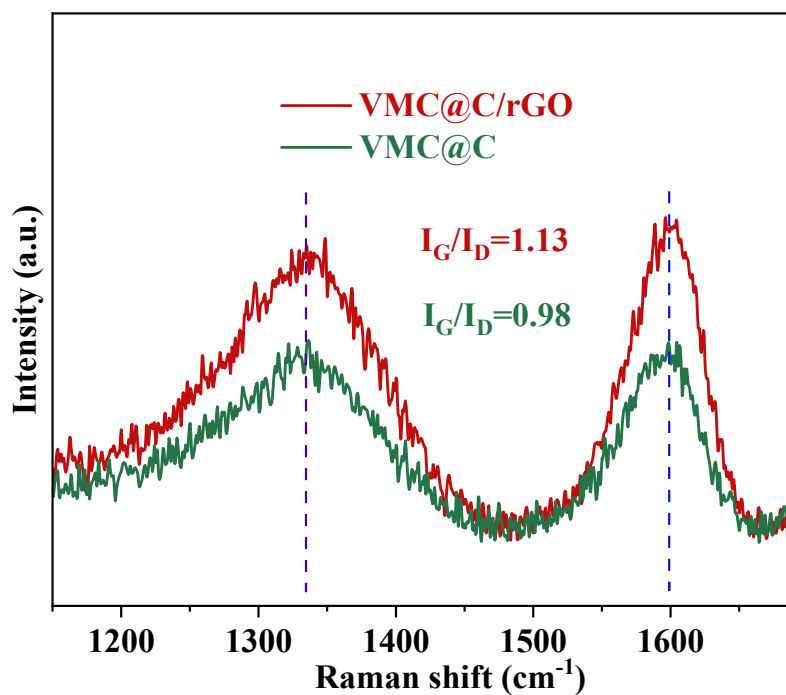

Fig. S3. Raman spectra of VMC@C and VMC@C/rGO.

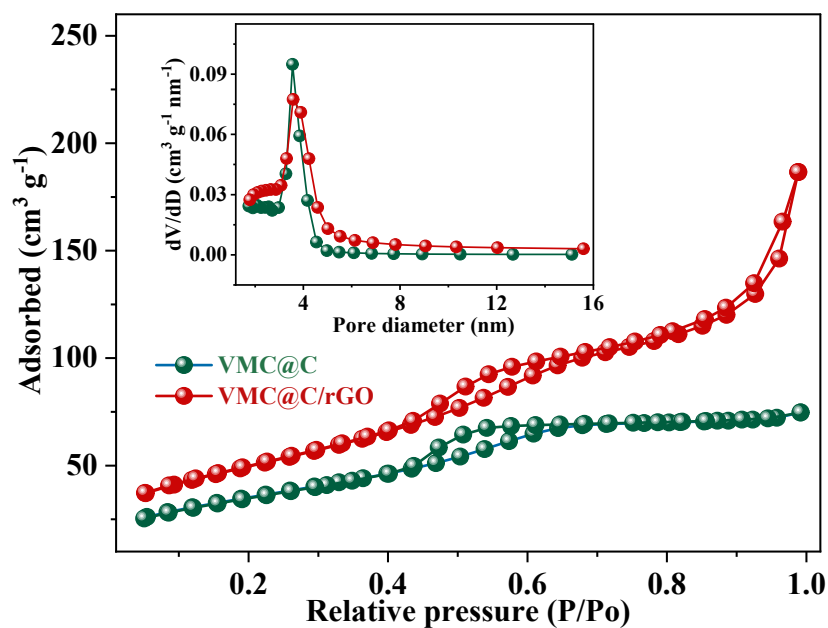

**Fig. S4.** The nitrogen adsorption-desorption curve and pore-size distribution of VMC@C and VMC@C/rGO.

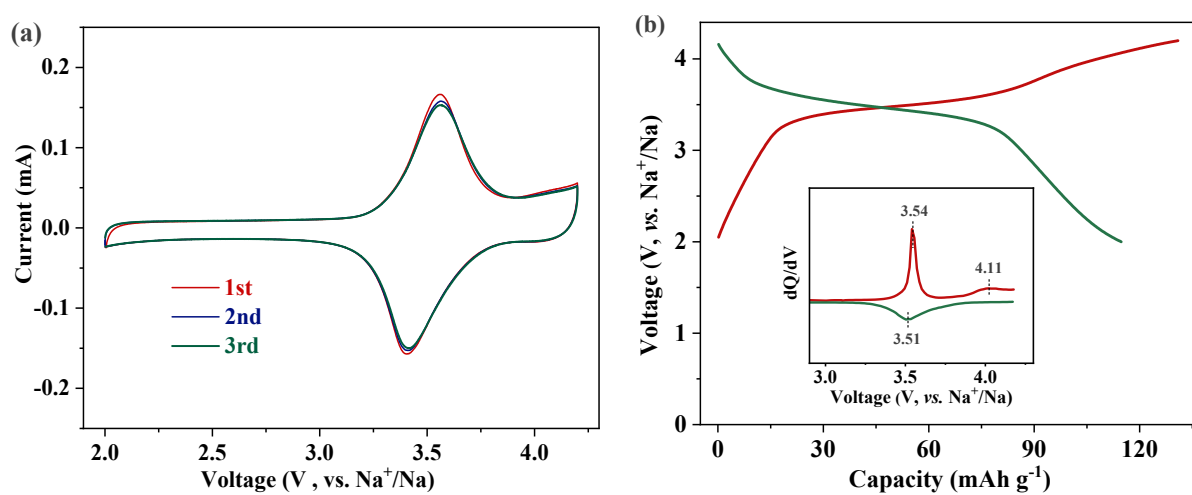

**Fig. S5.** (a) CV curves of VMC@C at 0.2 mV s<sup>-1</sup>, (b) charge-discharge curve of VMC@C/rGO at 0.2 C, inset is the corresponding dQ/dV plot.

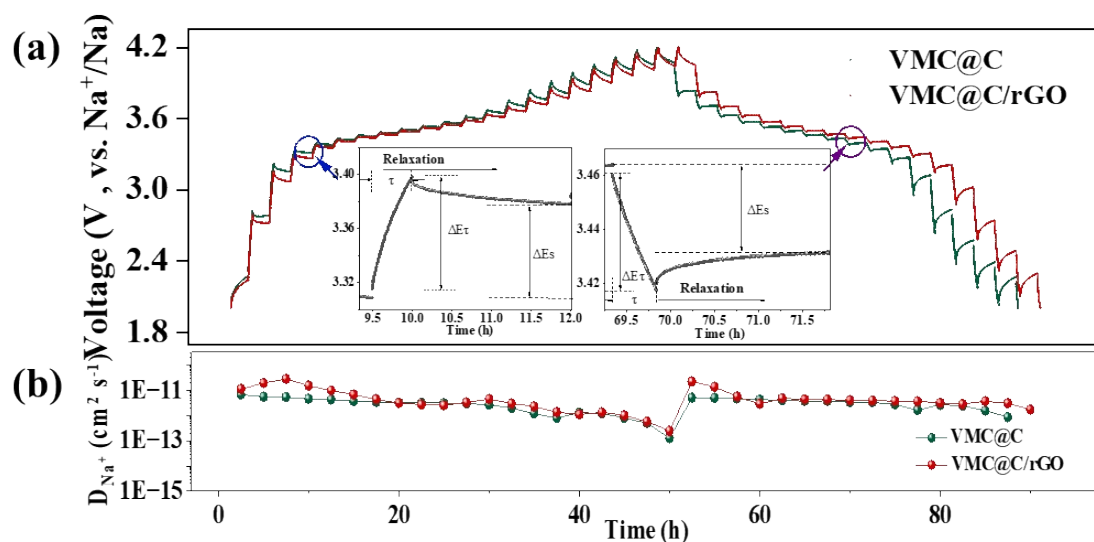

**Fig. S6.** GITT profiles (a) and overall trends of Na ion diffusion coefficient (b) during the sodiation/desodiation process of VMC@C and VMC@C/rGO.

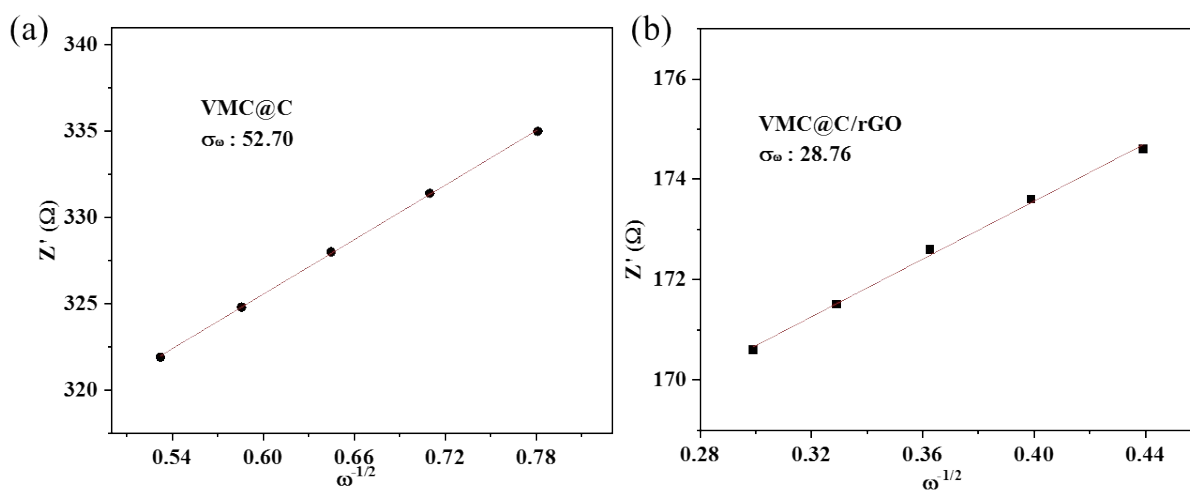

**Fig. S7.** Real impedance versus the reciprocal square root of frequency plots to determine the Warburg coefficients ( $\sigma_\omega$ ).

**Table S3.** Comparison of the cycling stability of VMC@C/rGO electrode in this work with recent publications on NASICON-type cathode materials.

| Composite                                                                           | Cycle number | retention | Ref.      |
|-------------------------------------------------------------------------------------|--------------|-----------|-----------|
| $\text{Na}_{3.5}\text{VMn}_{0.5}\text{Cr}_{0.5}(\text{PO}_4)_3@\text{C}/\text{rGO}$ | 8000         | 81%       | This work |
| $\text{Na}_3\text{V}_2(\text{PO}_4)_3@\text{C}@\text{CMK-3}$                        | 1000         | 67.3%     | 54        |
| $\text{Na}_3\text{V}_2(\text{PO}_4)_2\text{O}_2\text{F-hs}$                         | 2000         | 66.2%     | 55        |
| $\text{rGO}@\text{Na}_3\text{MnTi}(\text{PO}_4)_3\text{-C}$                         | 3500         | 74.5 %    | 56        |
| $\text{Na}_4\text{MnV}(\text{PO}_4)_3@\text{C}@\text{Ga}$                           | 4000         | 68.8 %    | 57        |
| $\text{Na}_4\text{Fe}_3(\text{PO}_4)_2(\text{P}_2\text{O}_7)/\text{C}$              | 4400         | 69 %      | 58        |
| $\text{Na}_3\text{Fe}_{0.5}\text{V}_{1.5}(\text{PO}_4)_3$                           | 5000         | 77.7 %    | 59        |
| Ru-doped $\text{Na}_3\text{V}_2\text{O}_2(\text{PO}_4)_2\text{F}$                   | 7500         | 77.3 %    | 60        |

**Table S4.** Diffusion coefficients of  $\text{Na}^+$  ion calculated from CV method.

| $D_{\text{Na}^+}$ | VMC@C    | VMC@C/rGO |
|-------------------|----------|-----------|
| O1                | 3.85E-12 | 2.26E-11  |
| R1                | 3.74E-12 | 1.69E-11  |

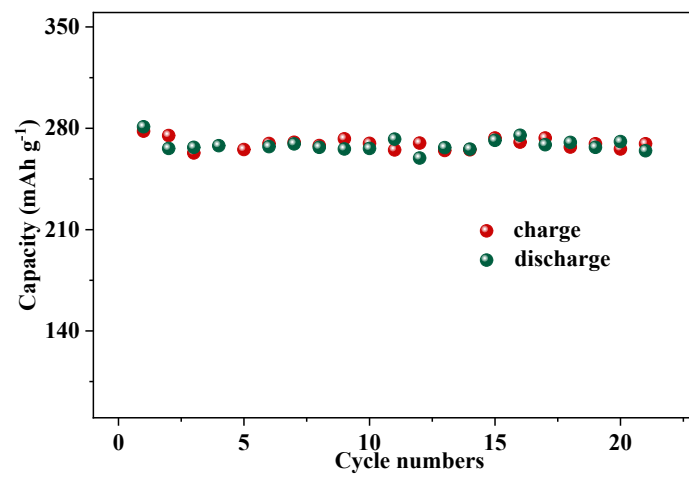

**Fig. S8.** Cycle performance of hard carbon at 0.2 C.
